# Supplementary material
Source: PubMed Central journal article supplement (PMC3464009)
Supplement: NIHMS409936-supplement-supplemental_matls.pdf [file NIHMS409936-supplement-supplemental_matls.pdf]

## **Supplementary Materials**

### **Influence of Polymorphic OATP1B-Type Carriers on the Disposition of Docetaxel**

Anne-Joy M. de Graan, Cynthia S. Lancaster, Amanda Obaidat, Bruno Hagenbuch, Laure Elens, Lena E. Friberg, Peter de Bruijn, Shuiying Hu, Alice A. Gibson, Gitte H. Bruun, Thomas J. Corydon, Torben S. Mikkelsen, Aisha L. Walker, Guoqing Du, Walter J. Loos, Ron H. N. van Schaik, Sharyn D. Baker, Ron H. J. Mathijssen, and Alex Sparreboom

## METHODS

### Determination of Docetaxel Concentrations

Docetaxel was quantified using a validated method involving reversed-phase liquid chromatography coupled to tandem mass-spectrometric detection. Sample extracts were injected onto an Alltima HP C18 HL 3  $\mu\text{m}$  column (50 $\times$ 2.1mm internal diameter, Alltech Applied Science) by a Waters 2795 Separation Module. The mobile phase was composed of acetonitrile and water containing formic acid (0.1% v/v), and was delivered using linear gradient settings at a flow rate of 0.2 mL/min. Detection was performed with a MicroMass Quatro Micro triple-quadrupole mass spectrometer (Waters) in the positive ion mode. The electrospray ionization was set at 3.8 kV and the cone voltage at 18V. The dwell times were set at 150 ms and the inter-channel delay at 50 ms. Multiple reaction monitoring mode was applied for the quantitation with the following parameters:  $m/z$  808>527, collision energy at 9 eV for docetaxel and  $m/z$  813>532, collision energy at 10 eV for the internal standard docetaxel- $\text{d}_5$ . The collision cell pressure was set at  $\sim 4 \times 10^{-3}$  mbar (argon).

## Supplementary Figure Legends

**Supplementary Fig. S1.** (A) Influence of Phenol Red on OATP1B1-mediated transport of docetaxel *in vitro*. Transport of docetaxel (concentration, 0.1  $\mu\text{M}$ ; 60-min incubations) was evaluated in Flp-In T-Rex293 cells transfected with OATP1B1 in the absence or presence of Phenol Red at a concentration of 10  $\mu\text{g}/\text{mL}$  (26.4  $\mu\text{M}$ ). Data represent the mean of 3 observations, and are expressed as the average percent of uptake values in cells transfected with an empty vector (VC). Error bars represent the standard error. The *P*-value denotes a statistical comparison of differences in uptake of docetaxel by OATP1B1 in the absence or presence of Phenol Red. (B) Visualization of Flp-In T-Rex293 cells transfected with an empty vector (VC) or OATP1B1 cultured in DMEM containing Phenol Red (10  $\mu\text{g}/\text{mL}$ ) indicating accumulation of Phenol Red in cells expressing OATP1B1.

**Supplementary Fig. S2.** Characterization of paclitaxel concentration-dependent transport by OATP1B1 (A) and OATP1B3 (B) in CHO cells. Data represent the mean and standard deviation of 2 to 5 independent experiments in cells stably expressing OATP1B1, OATP1B3, or in control cells (VC), and the net difference.  $K_m$  denotes the Michaelis-Menten constant, and  $V_{max}$  the maximum velocity.

**Supplementary Fig. S3.** Docetaxel clearance as a function of observed OATP1B1 (*SLCO1B1*) or OATP1B3 (*SLCO1B3*) diplotypes. Data were obtained in 141 predominantly white cancer patients receiving docetaxel-based chemotherapy. Each symbol represents an individual patient, and horizontal lines indicate median values. The *P*-value denotes a statistical comparison of the clearance of docetaxel in the different diplotype group. The composition and frequencies (Freq) of the observed haplotypes in OATP1B1 and OATP1B3 are shown below the figures and compared with reported frequency values in the literature. **Ramsey et al.** refers to:

Ramsey LB, Bruun GH, Yang W, et al: Rare versus common variants in pharmacogenetics: *SLCO1B1* variation and methotrexate disposition. *Genome Res* 22:1-8, 2012; **Smith et al.** refers to: Smith NF, Marsh S, Scott-Horton TJ, et al: Variants in the *SLCO1B3* gene: interethnic distribution and association with paclitaxel pharmacokinetics. *Clin Pharmacol Ther.* 81:76-82, 2007.

**Supplementary Fig. S4.** Docetaxel clearance as a function of observed *OATP1B1* (*SLCO1B1*) and *OATP1B3* (*SLCO1B3*) genotypes. Data were pooled from the prospective cohort of 141 patients and a retrospective analysis on a cohort of 72 patients receiving docetaxel-based chemotherapy (Baker SD, Verweij J, Cusatis GA, et al. Pharmacogenetic pathway analysis of docetaxel elimination. *Clin Pharmacol Ther* 85:155-63, 2009). Each symbol represents an individual patient, and horizontal lines indicate median values. The P-value denotes a statistical comparison of the clearance of docetaxel in the different genotype group.

Supplementary Figure S1

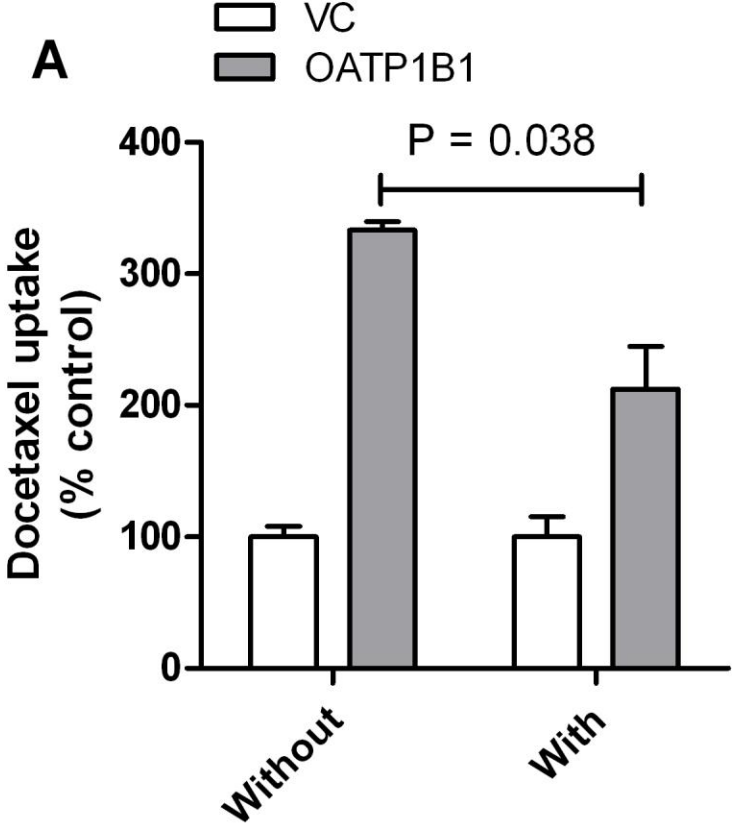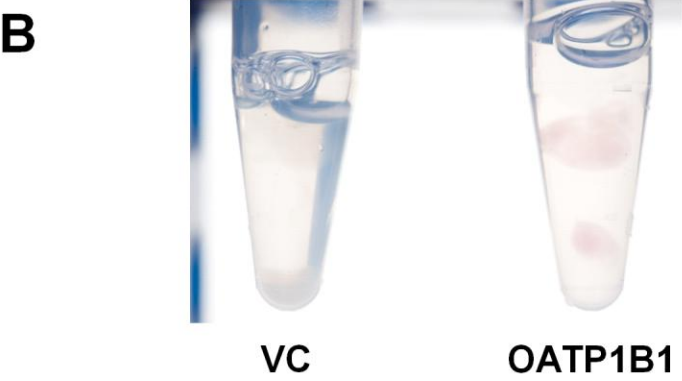

Supplementary Figure S2

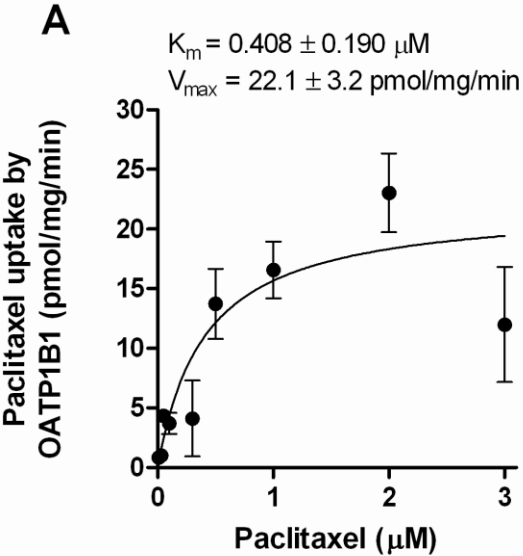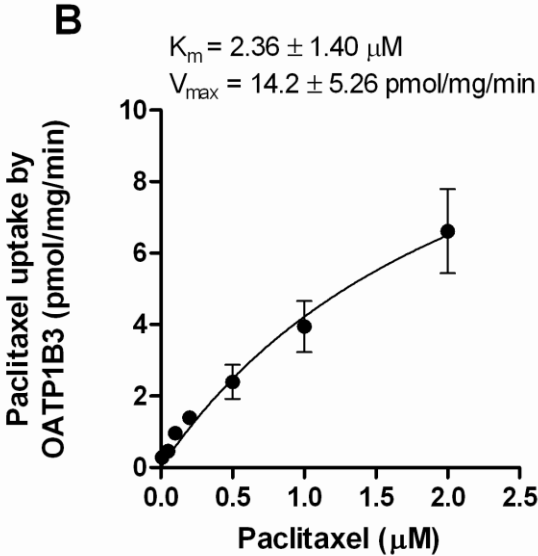

Supplementary Figure S3

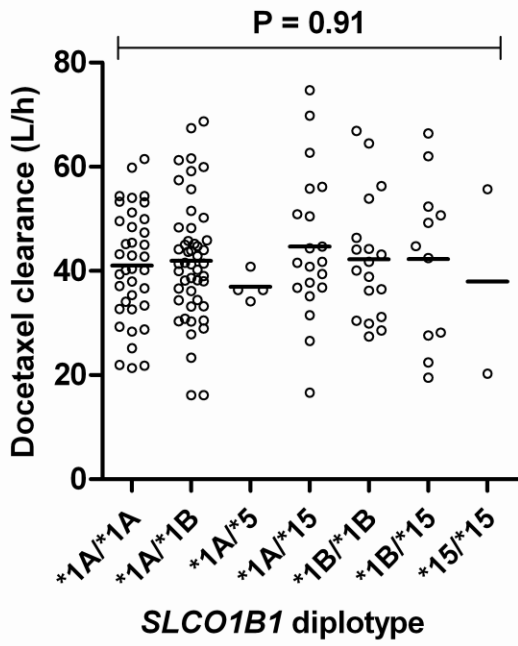

|     | Ramsey et al | Current | c.388 | c.521 |
|-----|--------------|---------|-------|-------|
|     | Freq         | Freq    |       |       |
| *1A | 0.540        | 0.521   | A     | T     |
| *1B | 0.140        | 0.339   | G     | T     |
| *5  | 0.005        | 0.014   | A     | C     |
| *15 | 0.120        | 0.125   | G     | C     |

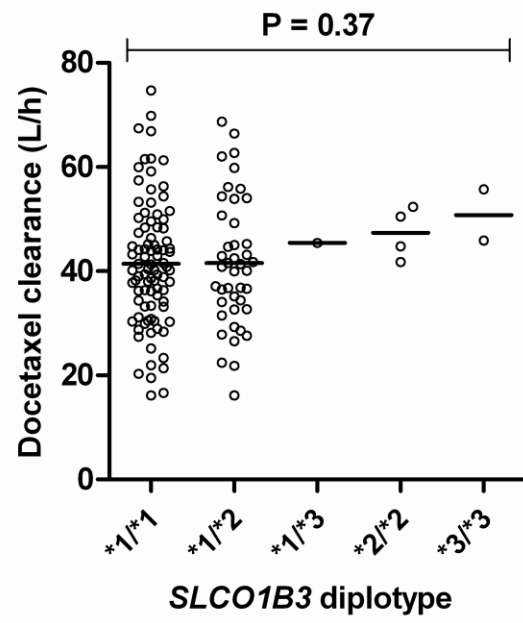

|    | Smith et al | Current | c.344 | c.699 |
|----|-------------|---------|-------|-------|
|    | Freq        | Freq    |       |       |
| *1 | 0.804       | 0.799   | G     | A     |
| *2 | 0.168       | 0.183   | T     | G     |
| *3 | 0.022       | 0.018   | G     | G     |
| *4 | 0.006       | 0.000   | T     | A     |

Supplementary Figure S4

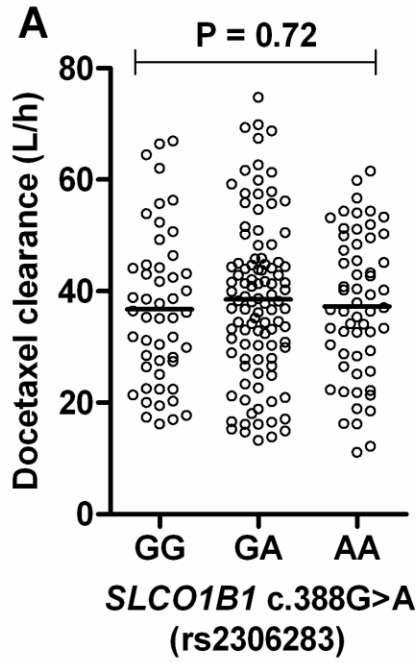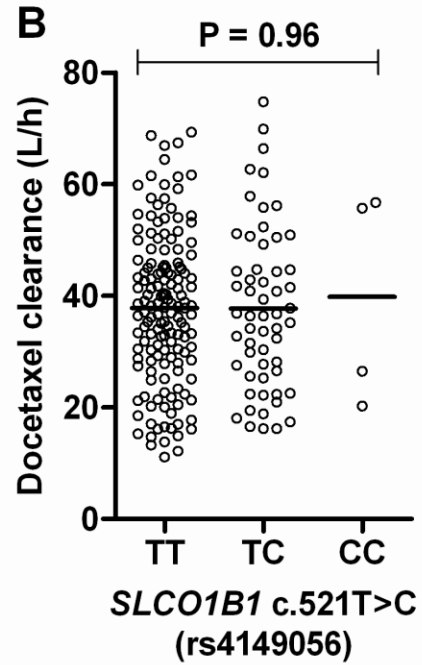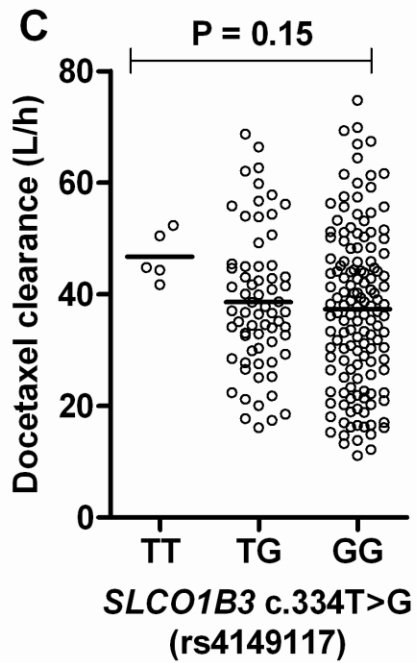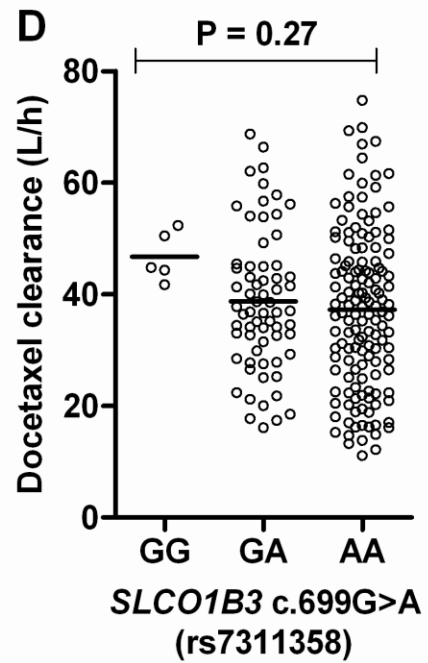



**Supplementary Table S1.** Genotyped variants in OATP1B1 (*SLCO1B1*) and OATP1B3 (*SLCO1B3*)

| Gene           | Position               | Location  | Effect <sup>a</sup> | Activity <sup>b</sup> | NCBI ID    | MAF <sup>c</sup> | MAF <sup>d</sup> | Assay <sup>e</sup> | Ref <sup>f</sup>     |
|----------------|------------------------|-----------|---------------------|-----------------------|------------|------------------|------------------|--------------------|----------------------|
| <i>SLCO1B1</i> | c.388A>G               | Exon 4    | p.Asn130Asp         | Increased             | Rs2306283  | 0.46 A           | 0.41 A           | C__1901697_20      | (1-6)                |
|                | c.521T>C               | Exon 5    | p.Val174Ala         | Decreased             | Rs4149056  | 0.14 C           | 0.12 C           | C__30633906_10     | (1,6-14)             |
|                | g.-11187 G>A           | Promotor  | -                   | Decreased             | Rs4149015  | 0.08 A           | 0.07 A           | C__32325356_10     | (6,14,15)            |
| <i>SLCO1B3</i> | c.334 T>G <sup>g</sup> | Exon 3    | p.Ser112Ala         | Unchanged             | Rs4149117  | 0.19 T           | 0.29 T           | C__25639181_40     | (16-21) <sup>g</sup> |
|                | c.699 G>A <sup>g</sup> | Exon 6    | p.Met233Ile         | Unchanged             | Rs7311358  | 0.19 G           | 0.29 G           | C__25765587_40     | (16-20) <sup>g</sup> |
|                | IVS12-567A>G           | Intron 12 | -                   | Decreased             | Rs11045585 | 0.13 G           | 0.17 G           | C__31106434_10     | (22,23)              |

<sup>a</sup> Number represents amino-acid codon

<sup>b</sup> Functional activity in vivo of the variant allele relative to the reference allele

<sup>c</sup> MAF in studied population

<sup>d</sup> MAF in dbSNP (<http://www.ncbi.nlm.nih.gov/projects/SNP>)

<sup>e</sup> TaqMan® (Applied Biosystems, CA, USA) genotyping assays used

<sup>f</sup> References for activity in vivo of the variant allele relative to the reference allele

<sup>g</sup> c.699 G>A and c.334 T>G are in complete linkage disequilibrium

*Abbreviations:* MAF; minor allele frequency, NCBI ID; National Center for Biotechnology Information identification number

## References

1. Choi JH, Lee MG, Cho JY, et al: Influence of OATP1B1 genotype on the pharmacokinetics of rosuvastatin in Koreans. *Clin Pharmacol Ther* 83:251-7, 2008
2. Rodrigues AC, Perin PM, Purim SG, et al: Pharmacogenetics of OATP Transporters Reveals That *SLCO1B1* c.388A>G Variant Is Determinant of Increased Atorvastatin Response. *Int J Mol Sci* 12:5815-27, 2011
3. Wen J, Xiong Y: OATP1B1 388A>G polymorphism and pharmacokinetics of pitavastatin in Chinese healthy volunteers. *J Clin Pharm Ther* 35:99-104, 2010
4. Kohlrausch FB, de Cassia Estrela R, Barroso PF, et al: The impact of *SLCO1B1* polymorphisms on the plasma concentration of lopinavir and ritonavir in HIV-infected men. *Br J Clin Pharmacol* 69:95-8, 2010

5. Han JY, Lim HS, Park YH, et al: Integrated pharmacogenetic prediction of irinotecan pharmacokinetics and toxicity in patients with advanced non-small cell lung cancer. *Lung Cancer* 63:115-20, 2009
6. Han JY, Lim HS, Shin ES, et al: Influence of the organic anion-transporting polypeptide 1B1 (OATP1B1) polymorphisms on irinotecan-pharmacokinetics and clinical outcome of patients with advanced non-small cell lung cancer. *Lung Cancer* 59:69-75, 2008
7. Niemi M, Backman JT, Kajosaari LI, et al: Polymorphic organic anion transporting polypeptide 1B1 is a major determinant of repaglinide pharmacokinetics. *Clin Pharmacol Ther* 77:468-78, 2005
8. Kalliokoski A, Backman JT, Neuvonen PJ, et al: Effects of the SLCO1B1\*1B haplotype on the pharmacokinetics and pharmacodynamics of repaglinide and nateglinide. *Pharmacogenet Genomics* 18:937-42, 2008
9. Kalliokoski A, Neuvonen M, Neuvonen PJ, et al: Different effects of SLCO1B1 polymorphism on the pharmacokinetics and pharmacodynamics of repaglinide and nateglinide. *J Clin Pharmacol* 48:311-21, 2008
10. Niemi M, Kivisto KT, Hofmann U, et al: Fexofenadine pharmacokinetics are associated with a polymorphism of the SLCO1B1 gene (encoding OATP1B1). *Br J Clin Pharmacol* 59:602-4, 2005
11. Katz DA, Carr R, Grimm DR, et al: Organic anion transporting polypeptide 1B1 activity classified by SLCO1B1 genotype influences atrasentan pharmacokinetics. *Clin Pharmacol Ther* 79:186-96, 2006
12. Vormfelde SV, Toliat MR, Schirmer M, et al: The polymorphisms Asn130Asp and Val174Ala in OATP1B1 and the CYP2C9 allele \*3 independently affect torsemide pharmacokinetics and pharmacodynamics. *Clin Pharmacol Ther* 83:815-7, 2008
13. Oswald S, Konig J, Lutjohann D, et al: Disposition of ezetimibe is influenced by polymorphisms of the hepatic uptake carrier OATP1B1. *Pharmacogenet Genomics* 18:559-68, 2008
14. Niemi M, Neuvonen PJ, Hofmann U, et al: Acute effects of pravastatin on cholesterol synthesis are associated with SLCO1B1 (encoding OATP1B1) haplotype \*17. *Pharmacogenet Genomics* 15:303-9, 2005
15. Niemi M, Schaeffeler E, Lang T, et al: High plasma pravastatin concentrations are associated with single nucleotide polymorphisms and haplotypes of organic anion transporting polypeptide-C (OATP-C, SLCO1B1). *Pharmacogenetics* 14:429-40, 2004
16. Smith NF, Marsh S, Scott-Horton TJ, et al: Variants in the SLCO1B3 gene: interethnic distribution and association with paclitaxel pharmacokinetics. *Clin Pharmacol Ther* 81:76-82, 2007
17. Baker SD, Verweij J, Cusatis GA, et al: Pharmacogenetic pathway analysis of docetaxel elimination. *Clin Pharmacol Ther* 85:155-63, 2009
18. Weiner M, Peloquin C, Burman W, et al: Effects of tuberculosis, race, and human gene SLCO1B1 polymorphisms on rifampin concentrations. *Antimicrob Agents Chemother* 54:4192-200, 2010
19. Nambu T, Hamada A, Nakashima R, et al: Association of SLCO1B3 polymorphism with intracellular accumulation of imatinib in leukocytes in patients with chronic myeloid leukemia. *Biol Pharm Bull* 34:114-9, 2011
20. Takahashi N, Miura M, Scott SA, et al: Influence of CYP3A5 and drug transporter polymorphisms on imatinib trough concentration and clinical response among patients with chronic phase chronic myeloid leukemia. *J Hum Genet* 55:731-7, 2010

21. Geng F, Jiao Z, Dao YJ, Qiu XY, Ding JJ, Shi XJ et al. The association of the UGT1A8, SLCO1B3 and ABCC2/ABCG2 genetic polymorphisms with the pharmacokinetics of mycophenolic acid and its phenolic glucuronide metabolite in Chinese individuals. *Clin Chim Acta* 413: 683-90, 2012.
22. Kiyotani K, Mushiroda T, Kubo M, et al: Association of genetic polymorphisms in SLCO1B3 and ABCC2 with docetaxel-induced leukopenia. *Cancer Sci* 99:967-72, 2008
23. Chew SC, Singh O, Chen X, et al: The effects of CYP3A4, CYP3A5, ABCB1, ABCC2, ABCG2 and SLCO1B3 single nucleotide polymorphisms on the pharmacokinetics and pharmacodynamics of docetaxel in nasopharyngeal carcinoma patients. *Cancer Chemother Pharmacol* 67:1471-8, 2011

**Supplementary Table S2. Patient characteristics<sup>a</sup>**

| Characteristic                    | Value              |
|-----------------------------------|--------------------|
| Number of patients                | 141                |
| Age, years                        | 55 (18 – 85)       |
| Sex                               |                    |
| Male                              | 54 (38)            |
| Female                            | 87 (62)            |
| BSA, m <sup>2</sup>               | 1.86 (1.37 – 2.60) |
| <i>Racial ancestry</i>            |                    |
| Caucasian                         | 131 (93)           |
| Sub-Saharan                       | 2 (1.4)            |
| Northern African                  | 1 (0.7)            |
| Eastern Asian                     | 3 (2.1)            |
| Hindustan                         | 3 (2.1)            |
| Unknown                           | 1 (0.7)            |
| Docetaxel dose, mg/m <sup>2</sup> | 75 (30 – 100)      |
| Docetaxel dose, mg                | 150 (50 – 230)     |
| <i>Primary tumor</i>              |                    |
| Breast                            | 74 (53)            |
| Prostate                          | 21 (15)            |
| Melanoma                          | 11 (7.8)           |
| Head and neck                     | 10 (7.1)           |
| Sarcoma                           | 7 (5.0)            |
| Lung                              | 5 (3.5)            |
| Miscellaneous                     | 13 (9.2)           |

<sup>a</sup>Continuous data are given as median with range in parentheses, and categorical data are given as number of patients with percentage of the total population in parentheses.

**Supplementary Table S3.** Inhibitors of OATP1B1 and OATP1B3

| Compound       | OATP1B1                             |                 | OATP1B3                            |        |
|----------------|-------------------------------------|-----------------|------------------------------------|--------|
|                | IC <sub>50</sub> (μM) <sup>a</sup>  | Ref             | IC <sub>50</sub> (μM) <sup>a</sup> | Ref    |
| Beclomethasone | 6.7                                 | (1)             | 1.4                                | (1)    |
| Bromocryptine  | 0.7                                 | (1)             | 1.8                                | (1)    |
| Clarithromycin | 8.26 <sup>b</sup> -96               | (2,3)           | 32                                 | (2)    |
| Cyclosporine   | 0.2 <sup>b</sup> -2.2               | (3-9)           | 0.06                               | (9)    |
| Ergocryptine   | 0.8                                 | (1)             | 2.2                                | (1)    |
| Erythromycin   | 11.4 <sup>a</sup> -217              | (2,3)           | 34                                 | (2)    |
| Estropipate    | 0.06                                | (1)             | 19.3                               | (1)    |
| Everolimus     | 4.1                                 | (10)            | 3.7                                | (10)   |
| Moricizine     | 8.1                                 | (1)             | 2.7                                | (1)    |
| Niflumic acid  | 3.7                                 | (1)             | 22.0                               | (1)    |
| Ramipril       | 4.0                                 | (1)             | 3.3                                | (1)    |
| Repaglinide    | 1.1-2.2                             | (1,11)          | 4.8                                | (1)    |
| Resveratrol    | 11.2                                | (1)             | 23.7                               | (1)    |
| Rifampicin     | 0.477 <sup>b</sup> -17 <sup>b</sup> | (1,3,4,6,12-14) | 1.5-5 <sup>b</sup>                 | (1,13) |
| Roxithromycin  | 153                                 | (2)             | 37                                 | (2)    |
| Sirolimus      | 9.8                                 | (10)            | 1.3                                | (10)   |
| Telithromycin  | 121                                 | (2)             | 11                                 | (2)    |
| Ursolic acid   | 12.5                                | (1)             | 2.3                                | (1)    |

<sup>a</sup> Inhibitor concentration producing 50% inhibition of transporter activity.

<sup>b</sup> Value represent inhibition constant (K<sub>i</sub>) provided instead of IC<sub>50</sub>.

## References

1. Gui C, Obaidat A, Chaguturu R, et al: Development of a cell-based high-throughput assay to screen for inhibitors of organic anion transporting polypeptides 1B1 and 1B3. *Curr Chem Genomics* 4:1-8, 2010
2. Seithel A, Eberl S, Singer K, et al: The influence of macrolide antibiotics on the uptake of organic anions and drugs mediated by OATP1B1 and OATP1B3. *Drug Metab Dispos* 35:779-86, 2007
3. Hirano M, Maeda K, Shitara Y, et al: Drug-drug interaction between pitavastatin and various drugs via OATP1B1. *Drug Metab Dispos* 34:1229-36, 2006
4. Treiber A, Schneiter R, Hausler S, et al: Bosentan is a substrate of human OATP1B1 and OATP1B3: inhibition of hepatic uptake as the common mechanism of its interactions with cyclosporin A, rifampicin, and sildenafil. *Drug Metab Dispos* 35:1400-7, 2007
5. Shitara Y, Itoh T, Sato H, et al: Inhibition of transporter-mediated hepatic uptake as a mechanism for drug-drug interaction between cerivastatin and cyclosporin A. *J Pharmacol Exp Ther* 304:610-6, 2003
6. Tirona RG, Leake BF, Wolkoff AW, et al: Human organic anion transporting polypeptide-C (SLC21A6) is a major determinant of rifampin-mediated pregnane X receptor activation. *J Pharmacol Exp Ther* 304:223-8, 2003
7. Campbell SD, de Morais SM, Xu JJ: Inhibition of human organic anion transporting polypeptide OATP 1B1 as a mechanism of drug-induced hyperbilirubinemia. *Chem Biol Interact* 150:179-87, 2004

8. Simonson SG, Raza A, Martin PD, et al: Rosuvastatin pharmacokinetics in heart transplant recipients administered an antirejection regimen including cyclosporine. *Clin Pharmacol Ther* 76:167-77, 2004
9. Ho RH, Tirona RG, Leake BF, et al: Drug and bile acid transporters in rosuvastatin hepatic uptake: function, expression, and pharmacogenetics. *Gastroenterology* 130:1793-806, 2006
10. Picard N, Levoir L, Lamoureux F, et al: Interaction of sirolimus and everolimus with hepatic and intestinal organic anion-transporting polypeptide transporters. *Xenobiotica* 41:752-7, 2011
11. Bachmakov I, Glaeser H, Fromm MF, et al: Interaction of oral antidiabetic drugs with hepatic uptake transporters: focus on organic anion transporting polypeptides and organic cation transporter 1. *Diabetes* 57:1463-9, 2008
12. Gui C, Miao Y, Thompson L, et al: Effect of pregnane X receptor ligands on transport mediated by human OATP1B1 and OATP1B3. *Eur J Pharmacol* 584:57-65, 2008
13. Vavricka SR, Van Montfoort J, Ha HR, et al: Interactions of rifamycin SV and rifampicin with organic anion uptake systems of human liver. *Hepatology* 36:164-72, 2002
14. Lau YY, Huang Y, Frassetto L, et al: effect of OATP1B transporter inhibition on the pharmacokinetics of atorvastatin in healthy volunteers. *Clin Pharmacol Ther* 81:194-204, 2007
